# Supplementary material
Source: publisher figshare collection journal article supplement (https://acs.figshare.com/ndownloader/files/9736630)
Supplement: Supplementary file 1 [file 9736630]

## Sheet: Sheet1
Search title	Sonali_itraq_1D human
MS data file	\\lumos\D\2017\April\Sonali_1d\Sonali_iTRAQ_1D.raw
Database	UniProt_human 20170314
Timestamp	18 Apr 2017 at 13:37:55 GMT
Type of search	MS/MS Ion Search
Quantitation	Sonali 4plex (Applied Biosystems iTRAQ(TM) 4-plex)
Enzyme	Trypsin
Fixed modifications	iTRAQ4plex (N-term),iTRAQ4plex (K)
Variable modifications	Oxidation (M),Carbamidomethyl (C)
Mass values	Monoisotopic
Protein mass	Unrestricted
Peptide mass tolerance	30 ppm
Fragment mass tolerance	0.3 Da
Max missed cleavages	1
Instrument type	ESI-QUAD
Number of queries	49839
Significance threshold p<	0.0003935
Max. number of families	AUTO
Ions score or expect cut-off	-1
Preferred taxonomy	All entries
Show Percolator scores?	no
Quantitation parameters:
Protein ratio type	weighted
Normalisation	none
Min. precursor charge	1
Outlier removal	none
Min. number of peptides	1
Peptide threshold	at least homology
Unique peptides only?	no
											Brij	DDM	NaCholate	TX100
Family	Member	Database	Accession	Score	Mass	Num. of matches	Num. of significant matches	Num. of sequences	Num. of significant sequences	emPAI	1	2	3	4	Description
352	1	UniProt_human	O43678	50	11923	1	1	1	1	0.41	---	---	---	---	NADH dehydrogenase [ubiquinone] 1 alpha subcomplex subunit 2 OS=Homo sapiens GN=NDUFA2 PE=1 SV=3
305	1	UniProt_human	Q8NC51	58	50126	1	1	1	1	0.09	---	---	---	---	Plasminogen activator inhibitor 1 RNA-binding protein OS=Homo sapiens GN=SERBP1 PE=1 SV=2
328	1	UniProt_human	A0A0J9YWF7	54	34514	1	1	1	1	0.13	1	29.452	9.459	12.157	Alpha-aminoadipic semialdehyde dehydrogenase OS=Homo sapiens GN=ALDH7A1 PE=1 SV=1
333	1	UniProt_human	P49721	54	24551	1	1	1	1	0.19	1	28.848	12.068	42.499	Proteasome subunit beta type-2 OS=Homo sapiens GN=PSMB2 PE=1 SV=1
359	1	UniProt_human	P14174	49	13045	1	1	1	1	0.37	1	27.822	6.226	18.873	Macrophage migration inhibitory factor OS=Homo sapiens GN=MIF PE=1 SV=4
263	1	UniProt_human	B0QYN7	64	22174	1	1	1	1	0.21	1	27.417	8.957	36.455	SUMO-conjugating enzyme OS=Homo sapiens GN=UBE2I PE=1 SV=1
40	1	UniProt_human	P55287	434	93675	19	19	9	9	0.5	1	23.215	13.279	22.502	Cadherin-11 OS=Homo sapiens GN=CDH11 PE=2 SV=2
92	1	UniProt_human	P30086	191	23349	12	12	3	3	0.71	1	16.648	3.183	20.354	Phosphatidylethanolamine-binding protein 1 OS=Homo sapiens GN=PEBP1 PE=1 SV=3
119	1	UniProt_human	A0A0A0MTS2	143	70260	5	5	4	4	0.27	1	15.613	5.203	25.628	Glucose-6-phosphate isomerase (Fragment) OS=Homo sapiens GN=GPI PE=1 SV=1
19	1	UniProt_human	P62937	760	20162	35	35	10	10	8.7	1	14.694	3.844	15.699	Peptidyl-prolyl cis-trans isomerase A OS=Homo sapiens GN=PPIA PE=1 SV=2
196	1	UniProt_human	A0A0C4DFU2	84	27040	2	2	1	1	0.17	1	13.908	4.767	16.823	Superoxide dismutase OS=Homo sapiens GN=SOD2 PE=1 SV=1
27	1	UniProt_human	P22392	664	19304	25	25	4	4	1.94	1	13.513	4.734	22.976	Nucleoside diphosphate kinase B OS=Homo sapiens GN=NME2 PE=1 SV=1
101	1	UniProt_human	P52758	171	15782	5	5	2	2	0.69	1	11.872	4.737	14.785	Ribonuclease UK114 OS=Homo sapiens GN=HRSP12 PE=1 SV=1
33	1	UniProt_human	P30405	566	24476	30	30	7	7	2.3	1	11.744	4.493	14.961	Peptidyl-prolyl cis-trans isomerase F, mitochondrial OS=Homo sapiens GN=PPIF PE=1 SV=1
266	1	UniProt_human	B1AH48	64	14804	1	1	1	1	0.32	1	11.607	2.706	12.344	Thiosulfate sulfurtransferase (Fragment) OS=Homo sapiens GN=TST PE=1 SV=1
35	1	UniProt_human	P00338	532	40844	32	32	7	7	1.06	1	11.59	2.851	15.167	L-lactate dehydrogenase A chain OS=Homo sapiens GN=LDHA PE=1 SV=2
321	1	UniProt_human	H0YF29	55	29877	1	1	1	1	0.15	1	11.352	2.873	10.886	UPF0598 protein C8orf82 (Fragment) OS=Homo sapiens GN=C8orf82 PE=1 SV=1
53	1	UniProt_human	B4DGU4	311	88603	17	17	7	7	0.47	1	11.066	7.474	11.212	Catenin beta-1 OS=Homo sapiens GN=CTNNB1 PE=1 SV=1
8	1	UniProt_human	P06733	1544	52759	74	74	18	18	3.58	1	10.693	2.994	10.199	Alpha-enolase OS=Homo sapiens GN=ENO1 PE=1 SV=2
46	1	UniProt_human	G3V1A4	362	20403	12	12	2	2	0.5	1	10.579	2.799	14.764	Cofilin 1 (Non-muscle), isoform CRA_a OS=Homo sapiens GN=CFL1 PE=1 SV=1
282	1	UniProt_human	H0YKB3	61	14144	3	3	2	2	0.8	1	10.426	3.389	15.035	Sorbitol dehydrogenase OS=Homo sapiens GN=SORD PE=1 SV=1
6	1	UniProt_human	P29401	1672	74031	84	84	24	24	3.68	1	9.938	3.34	14.285	Transketolase OS=Homo sapiens GN=TKT PE=1 SV=3
148	1	UniProt_human	O95994	115	22705	5	5	3	3	1.09	1	9.437	3.162	9.914	Anterior gradient protein 2 homolog OS=Homo sapiens GN=AGR2 PE=1 SV=1
25	1	UniProt_human	P00505	677	51810	28	28	7	7	1.08	1	9.035	4.109	13.715	Aspartate aminotransferase, mitochondrial OS=Homo sapiens GN=GOT2 PE=1 SV=3
301	1	UniProt_human	F5GY34	58	7770	1	1	1	1	0.68	1	8.81	6.442	13.51	Proteasome subunit alpha type-7-like OS=Homo sapiens GN=PSMA8 PE=4 SV=2
272	1	UniProt_human	F8WDS9	63	10285	2	2	1	1	0.49	1	8.765	3.777	14.968	LanC-like protein 1 OS=Homo sapiens GN=LANCL1 PE=1 SV=1
329	1	UniProt_human	P61081	54	23625	1	1	1	1	0.19	1	8.635	8.417	7.245	NEDD8-conjugating enzyme Ubc12 OS=Homo sapiens GN=UBE2M PE=1 SV=1
286	1	UniProt_human	J3KNQ3	60	42975	1	1	1	1	0.1	1	8.593	5.523	19.722	26S proteasome non-ATPase regulatory subunit 13 OS=Homo sapiens GN=PSMD13 PE=1 SV=1
249	1	UniProt_human	Q5T440	68	39428	1	1	1	1	0.11	1	8.524	6.292	8.384	Putative transferase CAF17, mitochondrial OS=Homo sapiens GN=IBA57 PE=1 SV=1
367	1	UniProt_human	Q9Y277	46	34674	1	1	1	1	0.13	1	8.137	5.764	16.395	Voltage-dependent anion-selective channel protein 3 OS=Homo sapiens GN=VDAC3 PE=1 SV=1
15	2	UniProt_human	P32119	509	24040	33	33	9	9	3.78	1	8.062	1.127	10.449	Peroxiredoxin-2 OS=Homo sapiens GN=PRDX2 PE=1 SV=5
231	1	UniProt_human	B4DLR8	73	25805	4	4	2	2	0.38	1	8.017	2.123	9.389	NAD(P)H dehydrogenase [quinone] 1 OS=Homo sapiens GN=NQO1 PE=1 SV=1
69	1	UniProt_human	Q16658	241	58675	8	8	3	3	0.24	1	7.941	1.775	6.797	Fascin OS=Homo sapiens GN=FSCN1 PE=1 SV=3
96	1	UniProt_human	P25788	185	31153	5	5	2	2	0.31	1	7.761	3.184	10.482	Proteasome subunit alpha type-3 OS=Homo sapiens GN=PSMA3 PE=1 SV=2
251	2	UniProt_human	O60493	59	20336	2	2	2	2	0.51	1	7.696	2.628	13.458	Sorting nexin-3 OS=Homo sapiens GN=SNX3 PE=1 SV=3
53	2	UniProt_human	C9J826	72	32204	5	5	2	2	0.3	1	7.57	4.46	6.99	Junction plakoglobin (Fragment) OS=Homo sapiens GN=JUP PE=1 SV=8
233	1	UniProt_human	M0R0U3	72	19620	2	2	1	1	0.24	1	7.555	10.07	6.932	6-phosphogluconolactonase OS=Homo sapiens GN=PGLS PE=1 SV=1
251	1	UniProt_human	A0A087X0R6	68	21254	3	3	2	2	0.48	1	7.432	2.346	11.748	Sorting nexin-12 OS=Homo sapiens GN=SNX12 PE=1 SV=1
160	1	UniProt_human	P09496-2	106	25377	2	2	2	2	0.39	1	7.38	2.98	6.447	Isoform Non-brain of Clathrin light chain A OS=Homo sapiens GN=CLTA
11	1	UniProt_human	P38646	1437	81272	58	58	19	19	1.99	1	7.218	3.026	11.608	Stress-70 protein, mitochondrial OS=Homo sapiens GN=HSPA9 PE=1 SV=2
379	1	UniProt_human	Q96QK1	43	98422	1	1	1	1	0.04	1	7.127	6.437	7.878	Vacuolar protein sorting-associated protein 35 OS=Homo sapiens GN=VPS35 PE=1 SV=2
28	1	UniProt_human	B8ZZL8	602	12844	30	30	7	7	8.42	1	7.093	3.998	6.942	10 kDa heat shock protein, mitochondrial OS=Homo sapiens GN=HSPE1 PE=1 SV=1
15	1	UniProt_human	A0A0A0MSI0	1147	20981	68	68	12	12	12.3	1	7.057	1.087	9.127	Peroxiredoxin-1 (Fragment) OS=Homo sapiens GN=PRDX1 PE=1 SV=1
54	1	UniProt_human	P62942	308	13240	11	11	3	3	1.55	1	7.041	2.515	6.727	Peptidyl-prolyl cis-trans isomerase FKBP1A OS=Homo sapiens GN=FKBP1A PE=1 SV=2
16	1	UniProt_human	P22626	886	40289	26	26	6	6	0.87	1	6.649	7.207	7.415	Heterogeneous nuclear ribonucleoproteins A2/B1 OS=Homo sapiens GN=HNRNPA2B1 PE=1 SV=2
153	1	UniProt_human	B7ZAR1	110	61222	4	4	4	4	0.32	1	6.614	4.309	8.987	T-complex protein 1 subunit epsilon OS=Homo sapiens GN=CCT5 PE=1 SV=1
103	1	UniProt_human	E5RGE1	164	6624	7	7	2	2	2.33	1	6.527	8.23	8.026	14-3-3 protein zeta/delta (Fragment) OS=Homo sapiens GN=YWHAZ PE=1 SV=8
137	1	UniProt_human	H0Y449	124	44008	1	1	1	1	0.1	1	6.487	6.376	7.955	Nuclease-sensitive element-binding protein 1 (Fragment) OS=Homo sapiens GN=YBX1 PE=1 SV=1
250	1	UniProt_human	E9PBS1	68	50378	1	1	1	1	0.09	1	6.48	3.44	8.485	Multifunctional protein ADE2 (Fragment) OS=Homo sapiens GN=PAICS PE=1 SV=1
4	1	UniProt_human	P10809	1815	68798	68	68	14	14	2.22	1	6.272	4.594	5.583	60 kDa heat shock protein, mitochondrial OS=Homo sapiens GN=HSPD1 PE=1 SV=2
177	1	UniProt_human	A0A087X0W7	93	49001	3	3	2	2	0.19	1	6.245	2.799	5.621	Acyl-coenzyme A thioesterase 2, mitochondrial OS=Homo sapiens GN=ACOT2 PE=1 SV=1
241	1	UniProt_human	D6RER6	70	19152	1	1	1	1	0.24	1	6.081	2.226	6.307	Oxygen-dependent coproporphyrinogen-III oxidase, mitochondrial OS=Homo sapiens GN=CPOX PE=1 SV=1
141	1	UniProt_human	A0A075B6Q0	120	15884	2	2	1	1	0.3	1	6.079	8.862	7.913	Ras-related protein Rap-1A (Fragment) OS=Homo sapiens GN=RAP1A PE=1 SV=1
103	3	UniProt_human	E9PG15	86	19343	5	5	3	3	0.91	1	5.985	6.37	7.303	14-3-3 protein theta (Fragment) OS=Homo sapiens GN=YWHAQ PE=1 SV=1
15	3	UniProt_human	Q13162	184	32538	9	9	4	4	0.68	1	5.958	1.134	8.174	Peroxiredoxin-4 OS=Homo sapiens GN=PRDX4 PE=1 SV=1
260	1	UniProt_human	O60701	65	60321	1	1	1	1	0.07	1	5.936	2.465	9.272	UDP-glucose 6-dehydrogenase OS=Homo sapiens GN=UGDH PE=1 SV=1
103	2	UniProt_human	P61981	160	30879	7	7	3	3	0.5	1	5.892	6.131	7.244	14-3-3 protein gamma OS=Homo sapiens GN=YWHAG PE=1 SV=2
76	1	UniProt_human	P25786	222	31410	7	7	3	3	0.49	1	5.871	2.658	8.098	Proteasome subunit alpha type-1 OS=Homo sapiens GN=PSMA1 PE=1 SV=1
75	1	UniProt_human	P50995	224	57958	14	14	5	5	0.44	1	5.823	4.934	5.89	Annexin A11 OS=Homo sapiens GN=ANXA11 PE=1 SV=1
189	1	UniProt_human	P27797	89	54308	3	3	2	2	0.17	1	5.799	2.659	7.099	Calreticulin OS=Homo sapiens GN=CALR PE=1 SV=1
275	1	UniProt_human	K7ENL7	63	11746	2	2	1	1	0.42	1	5.723	1.752	5.346	Vasodilator-stimulated phosphoprotein OS=Homo sapiens GN=VASP PE=1 SV=1
173	1	UniProt_human	A0A0A0MRL0	98	17365	1	1	1	1	0.27	1	5.653	5.067	9.299	Interleukin enhancer-binding factor 2 OS=Homo sapiens GN=ILF2 PE=1 SV=1
61	1	UniProt_human	Q15942	281	65129	13	13	4	4	0.3	1	5.637	1.648	4.703	Zyxin OS=Homo sapiens GN=ZYX PE=1 SV=1
316	1	UniProt_human	A0A087WWJ2	56	11304	2	2	1	1	0.44	1	5.446	2.126	8.322	N-alpha-acetyltransferase 50 OS=Homo sapiens GN=NAA50 PE=1 SV=1
23	1	UniProt_human	P40926	718	39371	30	30	9	9	2.24	1	5.417	3.917	7.492	Malate dehydrogenase, mitochondrial OS=Homo sapiens GN=MDH2 PE=1 SV=3
132	1	UniProt_human	M0R0Z0	131	5877	2	2	1	1	0.97	1	5.41	3.249	4.685	RuvB-like helicase OS=Homo sapiens GN=RUVBL2 PE=1 SV=1
59	1	UniProt_human	P17987	291	66214	13	13	6	6	0.47	1	5.395	3.563	8.891	T-complex protein 1 subunit alpha OS=Homo sapiens GN=TCP1 PE=1 SV=1
281	1	UniProt_human	B4DDD8	62	54015	1	1	1	1	0.08	1	5.372	3.647	8.051	Histidine--tRNA ligase, cytoplasmic OS=Homo sapiens GN=HARS PE=1 SV=1
110	1	UniProt_human	P35232	152	31659	7	7	6	6	1.22	1	5.224	2.702	7.763	Prohibitin OS=Homo sapiens GN=PHB PE=1 SV=1
138	1	UniProt_human	F8VXJ7	123	20481	1	1	1	1	0.23	1	5.203	1.19	3.206	Protein canopy homolog 2 (Fragment) OS=Homo sapiens GN=CNPY2 PE=1 SV=1
80	1	UniProt_human	Q5SZU1	213	56366	6	6	2	2	0.16	1	5.104	3.875	6.828	D-3-phosphoglycerate dehydrogenase OS=Homo sapiens GN=PHGDH PE=1 SV=1
297	1	UniProt_human	P25398	59	16955	1	1	1	1	0.28	1	5.089	3.897	7.458	40S ribosomal protein S12 OS=Homo sapiens GN=RPS12 PE=1 SV=3
2	1	UniProt_human	P60709	2307	44592	109	109	19	19	11.84	1	5.069	4.561	8.822	Actin, cytoplasmic 1 OS=Homo sapiens GN=ACTB PE=1 SV=1
228	1	UniProt_human	A6NP24	74	28704	1	1	1	1	0.16	1	4.946	4.11	6.437	Quinone oxidoreductase (Fragment) OS=Homo sapiens GN=CRYZ PE=1 SV=1
224	1	UniProt_human	Q5JRA6	76	235042	3	3	1	1	0.02	1	4.942	2.844	5.401	Melanoma inhibitory activity protein 3 OS=Homo sapiens GN=MIA3 PE=1 SV=1
240	1	UniProt_human	P28070	71	30050	3	3	2	2	0.32	1	4.94	2.688	8.163	Proteasome subunit beta type-4 OS=Homo sapiens GN=PSMB4 PE=1 SV=4
89	1	UniProt_human	P04899	196	44460	4	4	2	2	0.21	1	4.94	3.511	6.682	Guanine nucleotide-binding protein G(i) subunit alpha-2 OS=Homo sapiens GN=GNAI2 PE=1 SV=3
143	1	UniProt_human	I3L3B0	118	21707	4	4	1	1	0.47	1	4.934	2.402	5.586	Complement component 1 Q subcomponent-binding protein, mitochondrial OS=Homo sapiens GN=C1QBP PE=1 SV=1
159	1	UniProt_human	Q99714	107	28635	6	6	5	5	1.08	1	4.921	3.011	8.224	3-hydroxyacyl-CoA dehydrogenase type-2 OS=Homo sapiens GN=HSD17B10 PE=1 SV=3
12	1	UniProt_human	P14618	1341	63376	68	68	21	21	3.96	1	4.814	1.759	8.086	Pyruvate kinase PKM OS=Homo sapiens GN=PKM PE=1 SV=4
71	1	UniProt_human	P55072	237	96183	9	9	7	7	0.36	1	4.734	3.142	7.658	Transitional endoplasmic reticulum ATPase OS=Homo sapiens GN=VCP PE=1 SV=4
374	1	UniProt_human	P31942	44	38200	1	1	1	1	0.12	1	4.667	3.56	7.326	Heterogeneous nuclear ribonucleoprotein H3 OS=Homo sapiens GN=HNRNPH3 PE=1 SV=2
26	1	UniProt_human	P09651-2	665	36913	16	16	5	5	0.98	1	4.641	4.1	4.446	Isoform A1-A of Heterogeneous nuclear ribonucleoprotein A1 OS=Homo sapiens GN=HNRNPA1
78	1	UniProt_human	G3V5Z7	216	31011	6	6	4	4	0.72	1	4.58	2.148	7.169	Proteasome subunit alpha type OS=Homo sapiens GN=PSMA6 PE=1 SV=1
94	1	UniProt_human	F5GWF6	187	62247	5	5	4	4	0.4	1	4.549	2.89	7.351	T-complex protein 1 subunit beta OS=Homo sapiens GN=CCT2 PE=1 SV=2
274	1	UniProt_human	Q5T1J5	63	16344	1	1	1	1	0.29	1	4.533	3.642	6.127	Putative coiled-coil-helix-coiled-coil-helix domain-containing protein CHCHD2P9, mitochondrial OS=Homo sapiens GN=CHCHD2P9 PE=5 SV=1
35	2	UniProt_human	P07195	304	40506	13	13	4	4	0.52	1	4.522	2.277	4.05	L-lactate dehydrogenase B chain OS=Homo sapiens GN=LDHB PE=1 SV=2
79	1	UniProt_human	A0A0U1RQF0	213	285419	12	12	7	7	0.11	1	4.522	3.071	7.039	Fatty acid synthase OS=Homo sapiens GN=FASN PE=1 SV=1
115	1	UniProt_human	Q99832	149	65381	3	3	2	2	0.14	1	4.5	2.839	7.454	T-complex protein 1 subunit eta OS=Homo sapiens GN=CCT7 PE=1 SV=2
368	1	UniProt_human	J3QT28	46	33989	1	1	1	1	0.13	1	4.49	3.862	5.823	Mitotic checkpoint protein BUB3 (Fragment) OS=Homo sapiens GN=BUB3 PE=1 SV=1
202	1	UniProt_human	Q13200	81	107629	4	4	2	2	0.08	1	4.482	3.176	6.222	26S proteasome non-ATPase regulatory subunit 2 OS=Homo sapiens GN=PSMD2 PE=1 SV=3
156	1	UniProt_human	M0QXS5	108	62183	5	5	3	3	0.23	1	4.446	4.509	6.853	Heterogeneous nuclear ribonucleoprotein L (Fragment) OS=Homo sapiens GN=HNRNPL PE=1 SV=1
44	1	UniProt_human	P07737	398	16630	14	14	6	6	4.74	1	4.445	2.093	5.281	Profilin-1 OS=Homo sapiens GN=PFN1 PE=1 SV=2
191	1	UniProt_human	A8MUD9	85	27876	3	3	1	1	0.16	1	4.445	5.187	5.525	60S ribosomal protein L7 OS=Homo sapiens GN=RPL7 PE=1 SV=1
68	1	UniProt_human	P28074	243	29759	6	6	3	3	0.53	1	4.442	3.412	6.855	Proteasome subunit beta type-5 OS=Homo sapiens GN=PSMB5 PE=1 SV=3
105	1	UniProt_human	A0A087WTT1	162	64407	3	3	2	2	0.14	1	4.376	3.514	4.995	Polyadenylate-binding protein OS=Homo sapiens GN=PABPC1 PE=1 SV=1
56	1	UniProt_human	P50991	294	63652	11	11	7	7	0.59	1	4.357	2.78	6.419	T-complex protein 1 subunit delta OS=Homo sapiens GN=CCT4 PE=1 SV=4
7	1	UniProt_human	P11142	1652	78780	59	59	16	16	1.78	1	4.349	4.067	6.672	Heat shock cognate 71 kDa protein OS=Homo sapiens GN=HSPA8 PE=1 SV=1
21	1	UniProt_human	H3BQN4	727	43206	28	28	12	12	2.56	1	4.339	4.352	7.334	Fructose-bisphosphate aldolase OS=Homo sapiens GN=ALDOA PE=1 SV=1
235	1	UniProt_human	P62857	71	8413	3	3	2	2	1.62	1	4.313	2.764	5.233	40S ribosomal protein S28 OS=Homo sapiens GN=RPS28 PE=1 SV=1
90	1	UniProt_human	Q9BQ69	195	38941	5	5	2	2	0.24	1	4.292	1.781	5.915	O-acetyl-ADP-ribose deacetylase MACROD1 OS=Homo sapiens GN=MACROD1 PE=1 SV=2
243	1	UniProt_human	E9PP21	70	19955	2	2	1	1	0.23	1	4.288	3.061	5.457	Cysteine and glycine-rich protein 1 OS=Homo sapiens GN=CSRP1 PE=1 SV=1
66	2	UniProt_human	A0A087X1X7	212	74428	4	4	3	3	0.19	1	4.273	3.088	6.434	Elongation factor 1-delta OS=Homo sapiens GN=EEF1D PE=1 SV=1
55	1	UniProt_human	P17931	299	27433	13	13	3	3	0.58	1	4.261	2.545	5.509	Galectin-3 OS=Homo sapiens GN=LGALS3 PE=1 SV=5
355	1	UniProt_human	Q1KMD3	49	91969	1	1	1	1	0.05	1	4.228	2.782	4.431	Heterogeneous nuclear ribonucleoprotein U-like protein 2 OS=Homo sapiens GN=HNRNPUL2 PE=1 SV=1
72	2	UniProt_human	P38919	143	50300	5	5	2	2	0.18	1	4.217	4.273	5.665	Eukaryotic initiation factor 4A-III OS=Homo sapiens GN=EIF4A3 PE=1 SV=4
317	1	UniProt_human	R4GN08	56	10407	1	1	1	1	0.48	1	4.181	3.906	6.688	Actin-related protein 2/3 complex subunit 4 (Fragment) OS=Homo sapiens GN=ARPC4 PE=1 SV=1
37	1	UniProt_human	A0A0A0MR02	502	33643	12	12	3	3	0.46	1	4.133	1.104	6.801	Voltage-dependent anion-selective channel protein 2 (Fragment) OS=Homo sapiens GN=VDAC2 PE=1 SV=1
257	1	UniProt_human	P55060	66	118848	1	1	1	1	0.04	1	4.113	5.47	10.846	Exportin-2 OS=Homo sapiens GN=CSE1L PE=1 SV=3
310	1	UniProt_human	A0A0C4DGG8	57	132888	2	2	1	1	0.03	1	4.111	2.386	4.141	Cell division cycle and apoptosis regulator protein 1 (Fragment) OS=Homo sapiens GN=CCAR1 PE=1 SV=1
50	1	UniProt_human	P14625	330	103795	20	20	8	8	0.39	1	4.084	2.556	6.497	Endoplasmin OS=Homo sapiens GN=HSP90B1 PE=1 SV=1
52	1	UniProt_human	P22307	315	65728	17	17	7	7	0.79	1	4.059	1.092	6.484	Non-specific lipid-transfer protein OS=Homo sapiens GN=SCP2 PE=1 SV=2
63	1	UniProt_human	P04792	269	23921	5	5	3	3	0.69	1	4.049	2.919	5.161	Heat shock protein beta-1 OS=Homo sapiens GN=HSPB1 PE=1 SV=2
178	1	UniProt_human	P35579	93	256365	4	4	4	4	0.07	1	3.998	2.604	4.72	Myosin-9 OS=Homo sapiens GN=MYH9 PE=1 SV=4
194	1	UniProt_human	P56385	85	9081	1	1	1	1	0.56	1	3.993	4.594	6.604	ATP synthase subunit e, mitochondrial OS=Homo sapiens GN=ATP5I PE=1 SV=2
154	1	UniProt_human	Q9H3N1	109	33932	2	2	1	1	0.13	1	3.993	3.697	3.173	Thioredoxin-related transmembrane protein 1 OS=Homo sapiens GN=TMX1 PE=1 SV=1
84	1	UniProt_human	C9JFR7	204	14064	9	9	5	5	3.34	1	3.989	1.403	5.594	Cytochrome c (Fragment) OS=Homo sapiens GN=CYCS PE=1 SV=1
122	1	UniProt_human	P36957	140	52759	3	3	2	2	0.27	1	3.976	3.801	5.24	Dihydrolipoyllysine-residue succinyltransferase component of 2-oxoglutarate dehydrogenase complex, mitochondrial OS=Homo sapiens GN=DLST PE=1 SV=4
186	1	UniProt_human	A0A087WTV2	89	21881	1	1	1	1	0.21	1	3.972	2.278	7.16	Proteasome activator complex subunit 3 OS=Homo sapiens GN=PSME3 PE=1 SV=1
161	1	UniProt_human	Q15084	104	52414	3	3	2	2	0.17	1	3.912	2.649	4.578	Protein disulfide-isomerase A6 OS=Homo sapiens GN=PDIA6 PE=1 SV=1
357	1	UniProt_human	P62277	49	19950	2	2	2	2	0.52	1	3.894	6.039	6.013	40S ribosomal protein S13 OS=Homo sapiens GN=RPS13 PE=1 SV=2
348	1	UniProt_human	Q3KNR6	51	27066	1	1	1	1	0.17	1	3.885	2.022	5.517	Hsc70-interacting protein OS=Homo sapiens GN=ST13 PE=1 SV=1
42	1	UniProt_human	A0A087X0X3	424	83427	12	12	3	3	0.29	1	3.843	1.793	4.089	Heterogeneous nuclear ribonucleoprotein M OS=Homo sapiens GN=HNRNPM PE=1 SV=1
7	3	UniProt_human	A0A0G2JIW1	525	77415	29	29	10	10	0.73	1	3.818	3.371	5.89	Heat shock 70 kDa protein 1B OS=Homo sapiens GN=HSPA1B PE=1 SV=1
325	1	UniProt_human	B4E3S0	54	46333	1	1	1	1	0.1	1	3.783	3.392	2.967	Coronin OS=Homo sapiens GN=CORO1C PE=1 SV=1
73	1	UniProt_human	P22314	227	125556	7	7	6	6	0.22	1	3.772	2.981	4.107	Ubiquitin-like modifier-activating enzyme 1 OS=Homo sapiens GN=UBA1 PE=1 SV=3
302	1	UniProt_human	H0YJU2	58	16436	1	1	1	1	0.29	1	3.77	2.586	2.997	Activator of 90 kDa heat shock protein ATPase homolog 1 (Fragment) OS=Homo sapiens GN=AHSA1 PE=1 SV=1
88	1	UniProt_human	A0A0C4DG17	196	35022	4	4	2	2	0.27	1	3.754	4.655	6.277	40S ribosomal protein SA OS=Homo sapiens GN=RPSA PE=1 SV=1
43	1	UniProt_human	P50990	417	65635	13	13	7	7	0.57	1	3.74	2.482	6.121	T-complex protein 1 subunit theta OS=Homo sapiens GN=CCT8 PE=1 SV=4
100	1	UniProt_human	P07237	177	63998	4	4	3	3	0.22	1	3.726	2.24	5.135	Protein disulfide-isomerase OS=Homo sapiens GN=P4HB PE=1 SV=3
354	1	UniProt_human	P09669	50	9929	2	2	1	1	0.51	1	3.716	2.596	4.066	Cytochrome c oxidase subunit 6C OS=Homo sapiens GN=COX6C PE=1 SV=2
109	1	UniProt_human	H0YNE9	155	24448	8	8	3	3	0.67	1	3.713	3.088	6.817	Ras-related protein Rab-8B (Fragment) OS=Homo sapiens GN=RAB8B PE=1 SV=1
195	1	UniProt_human	P12004	84	31200	3	3	2	2	0.31	1	3.702	2.306	4.447	Proliferating cell nuclear antigen OS=Homo sapiens GN=PCNA PE=1 SV=1
86	1	UniProt_human	P26641	201	54843	7	7	3	3	0.26	1	3.689	2.688	5.502	Elongation factor 1-gamma OS=Homo sapiens GN=EEF1G PE=1 SV=3
129	1	UniProt_human	Q14974	136	103448	6	6	4	4	0.18	1	3.683	3.032	6.424	Importin subunit beta-1 OS=Homo sapiens GN=KPNB1 PE=1 SV=2
149	1	UniProt_human	H0YIZ0	112	30818	4	4	2	2	0.31	1	3.678	3.2	5.331	Serine hydroxymethyltransferase (Fragment) OS=Homo sapiens GN=SHMT2 PE=1 SV=1
226	1	UniProt_human	Q9BVC6	74	27346	1	1	1	1	0.17	1	3.675	2.647	5.11	Transmembrane protein 109 OS=Homo sapiens GN=TMEM109 PE=1 SV=1
387	1	UniProt_human	P23381	38	58319	1	1	1	1	0.08	1	3.661	2.651	3.258	Tryptophan--tRNA ligase, cytoplasmic OS=Homo sapiens GN=WARS PE=1 SV=2
288	1	UniProt_human	M0QYS1	60	28380	2	2	1	1	0.16	1	3.63	4.615	4.594	60S ribosomal protein L13a (Fragment) OS=Homo sapiens GN=RPL13A PE=1 SV=2
198	1	UniProt_human	P16144	83	211405	2	2	1	1	0.02	1	3.599	1.776	4.813	Integrin beta-4 OS=Homo sapiens GN=ITGB4 PE=1 SV=5
113	1	UniProt_human	G5EA31	150	116237	8	8	5	5	0.2	1	3.551	2.88	5.399	Protein transport protein Sec24C OS=Homo sapiens GN=SEC24C PE=1 SV=1
116	1	UniProt_human	A0A0G2JLD8	148	16597	7	7	3	3	1.11	1	3.538	2.04	3.16	Single-stranded DNA-binding protein, mitochondrial (Fragment) OS=Homo sapiens GN=SSBP1 PE=1 SV=1
10	2	UniProt_human	P07900	1215	96279	49	49	17	17	1.21	1	3.523	2.53	6.821	Heat shock protein HSP 90-alpha OS=Homo sapiens GN=HSP90AA1 PE=1 SV=5
77	1	UniProt_human	P37802	220	24250	10	10	6	6	2.36	1	3.515	1.982	5.376	Transgelin-2 OS=Homo sapiens GN=TAGLN2 PE=1 SV=3
108	1	UniProt_human	H0Y8G5	156	33827	5	5	1	1	0.13	1	3.506	3.194	4.813	Heterogeneous nuclear ribonucleoprotein D0 (Fragment) OS=Homo sapiens GN=HNRNPD PE=1 SV=8
30	1	UniProt_human	P04083	588	43445	20	20	10	10	1.64	1	3.483	5.263	3.112	Annexin A1 OS=Homo sapiens GN=ANXA1 PE=1 SV=2
347	1	UniProt_human	P35998	51	53358	1	1	1	1	0.08	1	3.481	3.09	6.954	26S protease regulatory subunit 7 OS=Homo sapiens GN=PSMC2 PE=1 SV=3
180	1	UniProt_human	P19367	92	111066	1	1	1	1	0.04	1	3.463	1.83	5.022	Hexokinase-1 OS=Homo sapiens GN=HK1 PE=1 SV=3
62	1	UniProt_human	O43390	278	77384	13	13	6	6	0.39	1	3.431	2.994	4.49	Heterogeneous nuclear ribonucleoprotein R OS=Homo sapiens GN=HNRNPR PE=1 SV=1
99	1	UniProt_human	M0R0K9	178	51286	5	5	4	4	0.39	1	3.423	3.35	5.876	Transcription intermediary factor 1-beta (Fragment) OS=Homo sapiens GN=TRIM28 PE=1 SV=1
346	1	UniProt_human	P13667	52	82398	1	1	1	1	0.05	1	3.419	2.867	4.829	Protein disulfide-isomerase A4 OS=Homo sapiens GN=PDIA4 PE=1 SV=2
70	2	UniProt_human	H7BZJ3	208	14664	8	8	4	4	2.1	1	3.397	2.949	3.043	Protein disulfide-isomerase A3 (Fragment) OS=Homo sapiens GN=PDIA3 PE=1 SV=1
193	1	UniProt_human	O95831	85	72911	3	3	2	2	0.12	1	3.375	2.579	4.004	Apoptosis-inducing factor 1, mitochondrial OS=Homo sapiens GN=AIFM1 PE=1 SV=1
104	1	UniProt_human	H0YEU2	162	20677	5	5	3	3	0.83	1	3.345	3.291	5.842	40S ribosomal protein S3 (Fragment) OS=Homo sapiens GN=RPS3 PE=1 SV=1
120	1	UniProt_human	B2R5W2	143	36252	10	10	2	2	0.42	1	3.311	4.587	3.876	Heterogeneous nuclear ribonucleoproteins C1/C2 OS=Homo sapiens GN=HNRNPC PE=1 SV=1
66	1	UniProt_human	P24534	258	28063	10	10	3	3	0.57	1	3.305	1.857	4.1	Elongation factor 1-beta OS=Homo sapiens GN=EEF1B2 PE=1 SV=3
83	1	UniProt_human	J3KPX7	205	36101	12	12	8	8	1.54	1	3.285	1.316	4.576	Prohibitin-2 OS=Homo sapiens GN=PHB2 PE=1 SV=2
20	1	UniProt_human	P06576	748	59983	32	32	10	10	1.68	1	3.277	2.928	5.488	ATP synthase subunit beta, mitochondrial OS=Homo sapiens GN=ATP5B PE=1 SV=3
10	1	UniProt_human	P08238	1460	94164	59	59	20	20	1.57	1	3.269	2.475	6.273	Heat shock protein HSP 90-beta OS=Homo sapiens GN=HSP90AB1 PE=1 SV=4
72	1	UniProt_human	E7EQG2	236	44290	9	9	3	3	0.33	1	3.266	3.361	4.343	Eukaryotic initiation factor 4A-II OS=Homo sapiens GN=EIF4A2 PE=1 SV=1
376	1	UniProt_human	Q15785	44	39005	1	1	1	1	0.11	1	3.266	2.081	2.96	Mitochondrial import receptor subunit TOM34 OS=Homo sapiens GN=TOMM34 PE=1 SV=2
308	1	UniProt_human	A0A087WZ27	57	16692	1	1	1	1	0.28	1	3.259	2.957	4.008	Zinc finger protein 90 OS=Homo sapiens GN=ZNF90 PE=4 SV=2
283	1	UniProt_human	Q96HC4	61	69092	2	2	2	2	0.13	1	3.259	2.607	4.604	PDZ and LIM domain protein 5 OS=Homo sapiens GN=PDLIM5 PE=1 SV=5
343	1	UniProt_human	A0A087X2D0	52	10746	2	2	2	2	1.14	1	3.243	8.166	3.667	Serine/arginine-rich-splicing factor 3 OS=Homo sapiens GN=SRSF3 PE=1 SV=1
291	1	UniProt_human	A0A0C4DG06	59	64150	1	1	1	1	0.07	1	3.236	3.073	4.494	Leucine-rich PPR motif-containing protein, mitochondrial OS=Homo sapiens GN=LRPPRC PE=1 SV=1
262	1	UniProt_human	Q92901	64	53472	3	3	1	1	0.08	1	3.227	3.699	4.294	60S ribosomal protein L3-like OS=Homo sapiens GN=RPL3L PE=2 SV=3
219	1	UniProt_human	S4R2X2	78	20770	1	1	1	1	0.22	1	3.212	1.93	6.242	Sideroflexin-1 OS=Homo sapiens GN=SFXN1 PE=1 SV=1
126	1	UniProt_human	K7ERI7	138	12891	4	4	2	2	0.9	1	3.201	5.165	4.236	60S ribosomal protein L22 OS=Homo sapiens GN=RPL22 PE=1 SV=1
47	1	UniProt_human	A2A274	354	95835	14	14	6	6	0.3	1	3.195	1.179	4.425	Aconitate hydratase, mitochondrial OS=Homo sapiens GN=ACO2 PE=1 SV=1
204	1	UniProt_human	H0YHA7	81	21268	3	3	2	2	0.48	1	3.187	4.965	4.433	60S ribosomal protein L18 (Fragment) OS=Homo sapiens GN=RPL18 PE=1 SV=1
384	1	UniProt_human	E7EM57	41	38825	1	1	1	1	0.11	1	3.186	2.538	5.49	Glucose-6-phosphate 1-dehydrogenase (Fragment) OS=Homo sapiens GN=G6PD PE=1 SV=1
36	1	UniProt_human	P00558	514	50783	25	25	10	10	1.71	1	3.183	3.261	4.969	Phosphoglycerate kinase 1 OS=Homo sapiens GN=PGK1 PE=1 SV=3
269	1	UniProt_human	P05198	63	39260	2	2	1	1	0.11	1	3.183	4.627	4.947	Eukaryotic translation initiation factor 2 subunit 1 OS=Homo sapiens GN=EIF2S1 PE=1 SV=3
9	1	UniProt_human	P04406	1513	39921	55	55	13	13	3.86	1	3.18	3.229	5.432	Glyceraldehyde-3-phosphate dehydrogenase OS=Homo sapiens GN=GAPDH PE=1 SV=3
248	1	UniProt_human	S4R398	69	23209	1	1	1	1	0.2	1	3.178	2.521	6.019	Transportin-1 (Fragment) OS=Homo sapiens GN=TNPO1 PE=1 SV=1
361	1	UniProt_human	J3KSW7	48	8679	1	1	1	1	0.6	1	3.17	2.787	3.455	Serine/arginine-rich-splicing factor 1 OS=Homo sapiens GN=SRSF1 PE=1 SV=1
362	1	UniProt_human	E7ESS4	47	35840	1	1	1	1	0.12	1	3.163	2.884	4.359	Intercellular adhesion molecule 1 OS=Homo sapiens GN=ICAM1 PE=1 SV=1
232	1	UniProt_human	O15143	72	44814	2	2	1	1	0.1	1	3.136	2.288	4.649	Actin-related protein 2/3 complex subunit 1B OS=Homo sapiens GN=ARPC1B PE=1 SV=3
10	3	UniProt_human	I3L0K7	457	62083	11	11	3	3	0.23	1	3.131	2.442	5.798	Heat shock protein 75 kDa, mitochondrial OS=Homo sapiens GN=TRAP1 PE=1 SV=1
306	1	UniProt_human	O00264	57	23531	1	1	1	1	0.19	1	3.121	3.564	3.983	Membrane-associated progesterone receptor component 1 OS=Homo sapiens GN=PGRMC1 PE=1 SV=3
147	1	UniProt_human	P41250	115	90750	3	3	2	2	0.1	1	3.12	2.445	4.069	Glycine--tRNA ligase OS=Homo sapiens GN=GARS PE=1 SV=3
162	1	UniProt_human	K7ERT7	104	15770	2	2	1	1	0.3	1	3.116	2.919	4.673	Synaptic vesicle membrane protein VAT-1 homolog (Fragment) OS=Homo sapiens GN=VAT1 PE=1 SV=1
117	1	UniProt_human	Q9BSJ8	147	130561	2	2	2	2	0.07	1	3.113	3.351	4.285	Extended synaptotagmin-1 OS=Homo sapiens GN=ESYT1 PE=1 SV=1
182	1	UniProt_human	E7EQV9	91	22803	3	3	1	1	0.2	1	3.108	6.816	3.904	Ribosomal protein L15 (Fragment) OS=Homo sapiens GN=RPL15 PE=1 SV=1
82	1	UniProt_human	P13639	206	104788	13	13	7	7	0.38	1	3.103	3.18	4.768	Elongation factor 2 OS=Homo sapiens GN=EEF2 PE=1 SV=4
7	2	UniProt_human	P11021	807	81223	34	34	15	15	1.3	1	3.092	3.027	5.087	78 kDa glucose-regulated protein OS=Homo sapiens GN=HSPA5 PE=1 SV=2
151	1	UniProt_human	Q6EEV6	112	12119	3	3	1	1	0.41	1	3.075	1.408	2.719	Small ubiquitin-related modifier 4 OS=Homo sapiens GN=SUMO4 PE=1 SV=2
304	1	UniProt_human	Q9P2J5	58	150519	1	1	1	1	0.03	1	3.065	2.197	6.591	Leucine--tRNA ligase, cytoplasmic OS=Homo sapiens GN=LARS PE=1 SV=2
216	1	UniProt_human	R4GN69	79	13547	2	2	2	2	0.84	1	3.061	2.46	3.969	Heat shock protein 105 kDa OS=Homo sapiens GN=HSPH1 PE=1 SV=1
184	1	UniProt_human	P28072	90	26062	4	4	3	3	0.62	1	3.042	1.235	4.435	Proteasome subunit beta type-6 OS=Homo sapiens GN=PSMB6 PE=1 SV=4
320	1	UniProt_human	O00231	55	52622	2	2	2	2	0.17	1	3.036	2.269	5.642	26S proteasome non-ATPase regulatory subunit 11 OS=Homo sapiens GN=PSMD11 PE=1 SV=3
142	1	UniProt_human	P08574	118	37560	2	2	1	1	0.12	1	3.036	2.5	4.505	Cytochrome c1, heme protein, mitochondrial OS=Homo sapiens GN=CYC1 PE=1 SV=3
336	1	UniProt_human	H0YHI8	53	45635	1	1	1	1	0.1	1	3.03	1.715	3.497	Protein phosphatase 1 regulatory subunit 12A (Fragment) OS=Homo sapiens GN=PPP1R12A PE=1 SV=1
244	1	UniProt_human	A0A087WWU8	69	29142	1	1	1	1	0.15	1	3.028	1.67	4.624	Tropomyosin alpha-3 chain OS=Homo sapiens GN=TPM3 PE=1 SV=1
210	1	UniProt_human	F8VPE8	81	18543	2	2	2	2	0.57	1	3.016	3.854	4.462	60S acidic ribosomal protein P0 (Fragment) OS=Homo sapiens GN=RPLP0 PE=1 SV=1
106	1	UniProt_human	A0A087WVQ6	160	206058	8	8	6	6	0.13	1	3.013	1.809	3.547	Clathrin heavy chain OS=Homo sapiens GN=CLTC PE=1 SV=1
259	1	UniProt_human	P05556	66	96715	2	2	2	2	0.09	1	3.003	2.038	4.153	Integrin beta-1 OS=Homo sapiens GN=ITGB1 PE=1 SV=2
107	1	UniProt_human	E9PEX6	158	57115	3	3	2	2	0.16	1	2.976	1.694	3.782	Dihydrolipoyl dehydrogenase OS=Homo sapiens GN=DLD PE=1 SV=1
279	1	UniProt_human	H7C2U6	62	27897	1	1	1	1	0.16	1	2.945	1.836	4	Protein NipSnap homolog 1 (Fragment) OS=Homo sapiens GN=NIPSNAP1 PE=1 SV=1
298	1	UniProt_human	Q99436	59	32540	1	1	1	1	0.14	1	2.942	1.951	4.177	Proteasome subunit beta type-7 OS=Homo sapiens GN=PSMB7 PE=1 SV=1
255	1	UniProt_human	Q8NBS9	67	51489	1	1	1	1	0.09	1	2.929	2.041	3.922	Thioredoxin domain-containing protein 5 OS=Homo sapiens GN=TXNDC5 PE=1 SV=2
18	1	UniProt_human	P25705	828	64181	25	25	9	9	0.81	1	2.912	2.091	5.121	ATP synthase subunit alpha, mitochondrial OS=Homo sapiens GN=ATP5A1 PE=1 SV=1
167	1	UniProt_human	P24752	100	49638	4	4	1	1	0.09	1	2.909	2.054	3.814	Acetyl-CoA acetyltransferase, mitochondrial OS=Homo sapiens GN=ACAT1 PE=1 SV=1
87	1	UniProt_human	H3BMT0	197	13520	4	4	2	2	0.84	1	2.903	1.013	2.752	Hematological and neurological-expressed 1-like protein (Fragment) OS=Homo sapiens GN=HN1L PE=1 SV=1
152	1	UniProt_human	P40227	111	64616	4	4	3	3	0.22	1	2.901	2.078	4.76	T-complex protein 1 subunit zeta OS=Homo sapiens GN=CCT6A PE=1 SV=3
157	1	UniProt_human	P04843	107	74435	4	4	3	3	0.19	1	2.892	1.814	2.719	Dolichyl-diphosphooligosaccharide--protein glycosyltransferase subunit 1 OS=Homo sapiens GN=RPN1 PE=1 SV=1
217	1	UniProt_human	P62081	77	25716	3	3	2	2	0.38	1	2.862	4.217	4.273	40S ribosomal protein S7 OS=Homo sapiens GN=RPS7 PE=1 SV=1
144	1	UniProt_human	P11216	117	104848	3	3	2	2	0.08	1	2.86	2.754	3.087	Glycogen phosphorylase, brain form OS=Homo sapiens GN=PYGB PE=1 SV=5
209	1	UniProt_human	P98179	81	17736	4	4	1	1	0.26	1	2.855	3.617	3.053	RNA-binding protein 3 OS=Homo sapiens GN=RBM3 PE=1 SV=1
172	1	UniProt_human	Q9Y265	98	56249	2	2	1	1	0.08	1	2.852	2.25	3.774	RuvB-like 1 OS=Homo sapiens GN=RUVBL1 PE=1 SV=1
268	1	UniProt_human	P51572	63	31721	1	1	1	1	0.14	1	2.851	2.254	5.582	B-cell receptor-associated protein 31 OS=Homo sapiens GN=BCAP31 PE=1 SV=3
296	1	UniProt_human	Q5JWQ6	59	88711	1	1	1	1	0.05	1	2.842	1.712	3.345	Neuropilin OS=Homo sapiens GN=NRP1 PE=1 SV=1
340	1	UniProt_human	M0QYV5	52	17845	1	1	1	1	0.26	1	2.831	1.396	2.635	ATP-dependent Clp protease proteolytic subunit (Fragment) OS=Homo sapiens GN=CLPP PE=1 SV=1
125	1	UniProt_human	F5H6X6	139	99614	5	5	4	4	0.19	1	2.804	2.013	3.749	Neutral alpha-glucosidase AB OS=Homo sapiens GN=GANAB PE=1 SV=1
303	1	UniProt_human	Q86UP2	58	182118	2	2	2	2	0.05	1	2.787	1.839	3.867	Kinectin OS=Homo sapiens GN=KTN1 PE=1 SV=1
190	1	UniProt_human	P50395	86	56107	3	3	3	3	0.25	1	2.784	1.502	3.664	Rab GDP dissociation inhibitor beta OS=Homo sapiens GN=GDI2 PE=1 SV=2
280	1	UniProt_human	A0A0C4DGI3	62	47845	1	1	1	1	0.09	1	2.761	2.814	3.44	Citrate synthase OS=Homo sapiens GN=CS PE=1 SV=1
169	1	UniProt_human	P13010	99	91875	3	3	2	2	0.1	1	2.755	2.599	3.318	X-ray repair cross-complementing protein 5 OS=Homo sapiens GN=XRCC5 PE=1 SV=3
201	1	UniProt_human	P00367	82	66259	3	3	2	2	0.14	1	2.734	3.865	2.679	Glutamate dehydrogenase 1, mitochondrial OS=Homo sapiens GN=GLUD1 PE=1 SV=2
252	1	UniProt_human	A0A087WX29	67	29320	1	1	1	1	0.15	1	2.725	3.412	3.452	TAR DNA-binding protein 43 (Fragment) OS=Homo sapiens GN=TARDBP PE=1 SV=1
171	1	UniProt_human	A0A087WTS8	98	58042	2	2	1	1	0.08	1	2.704	1.675	3.845	Heat shock 70 kDa protein 4 OS=Homo sapiens GN=HSPA4 PE=1 SV=1
183	1	UniProt_human	J3KSS0	91	8723	2	2	1	1	0.59	1	2.689	2.917	3.294	60S ribosomal protein L26 OS=Homo sapiens GN=RPL26 PE=4 SV=1
134	1	UniProt_human	G3V213	126	15756	4	4	2	2	0.69	1	2.687	1.874	3.007	Adenylate kinase 2, isoform CRA_a OS=Homo sapiens GN=AK2 PE=1 SV=1
95	1	UniProt_human	P31153	186	47668	4	4	3	3	0.3	1	2.686	2.095	3.996	S-adenosylmethionine synthase isoform type-2 OS=Homo sapiens GN=MAT2A PE=1 SV=1
229	1	UniProt_human	P62273	73	7393	1	1	1	1	0.72	1	2.675	2.885	3.857	40S ribosomal protein S29 OS=Homo sapiens GN=RPS29 PE=1 SV=2
227	1	UniProt_human	P09874	74	131313	1	1	1	1	0.03	1	2.67	2.505	2.972	Poly [ADP-ribose] polymerase 1 OS=Homo sapiens GN=PARP1 PE=1 SV=4
203	1	UniProt_human	Q96I24	81	65205	2	2	1	1	0.07	1	2.668	2.171	2.687	Far upstream element-binding protein 3 OS=Homo sapiens GN=FUBP3 PE=1 SV=2
378	1	UniProt_human	B8ZZA8	44	20063	1	1	1	1	0.23	1	2.659	1.532	4.029	Glutaminase kidney isoform, mitochondrial OS=Homo sapiens GN=GLS PE=1 SV=1
93	2	UniProt_human	E7EQR4	76	77254	4	4	3	3	0.18	1	2.657	2.985	3.644	Ezrin OS=Homo sapiens GN=EZR PE=1 SV=3
381	1	UniProt_human	P31689	42	50171	1	1	1	1	0.09	1	2.654	4.997	5.254	DnaJ homolog subfamily A member 1 OS=Homo sapiens GN=DNAJA1 PE=1 SV=2
271	1	UniProt_human	P53396	63	131281	2	2	2	2	0.07	1	2.633	2.308	4.011	ATP-citrate synthase OS=Homo sapiens GN=ACLY PE=1 SV=3
289	1	UniProt_human	E9PPJ0	60	110069	1	1	1	1	0.04	1	2.625	2.887	3.786	Splicing factor 3B subunit 2 OS=Homo sapiens GN=SF3B2 PE=1 SV=1
102	1	UniProt_human	P08758	169	39229	9	9	5	5	0.71	1	2.622	7.314	2.963	Annexin A5 OS=Homo sapiens GN=ANXA5 PE=1 SV=2
114	1	UniProt_human	P05141	149	36290	11	11	5	5	0.79	1	2.621	3.442	4.025	ADP/ATP translocase 2 OS=Homo sapiens GN=SLC25A5 PE=1 SV=7
158	1	UniProt_human	F5GXS2	107	63274	3	3	2	2	0.14	1	2.616	1.496	3.9	Alpha-actinin-4 OS=Homo sapiens GN=ACTN4 PE=1 SV=2
300	1	UniProt_human	H0YDD4	58	55636	2	2	1	1	0.08	1	2.61	3.674	4.337	Acetyltransferase component of pyruvate dehydrogenase complex (Fragment) OS=Homo sapiens GN=DLAT PE=1 SV=1
295	1	UniProt_human	F5H608	59	10351	2	2	2	2	1.21	1	2.599	2.852	5.417	ATP synthase subunit d, mitochondrial OS=Homo sapiens GN=ATP5H PE=1 SV=2
197	1	UniProt_human	H7C0X8	84	13173	1	1	1	1	0.37	1	2.592	1.5	2.279	Macrophage-capping protein (Fragment) OS=Homo sapiens GN=CAPG PE=1 SV=1
81	1	UniProt_human	B4DUR8	208	60394	6	6	4	4	0.32	1	2.582	1.699	3.916	T-complex protein 1 subunit gamma OS=Homo sapiens GN=CCT3 PE=1 SV=1
130	1	UniProt_human	H0YB39	133	32061	5	5	3	3	0.48	1	2.551	2.624	3.742	Heterogeneous nuclear ribonucleoprotein H (Fragment) OS=Homo sapiens GN=HNRNPH1 PE=1 SV=1
285	1	UniProt_human	H7C2I1	61	46469	3	3	2	2	0.31	1	2.54	1.392	3.594	Protein arginine N-methyltransferase 1 OS=Homo sapiens GN=PRMT1 PE=1 SV=1
166	1	UniProt_human	G3XAN0	101	8107	2	2	1	1	0.65	1	2.535	2.927	4.217	40S ribosomal protein S20 OS=Homo sapiens GN=RPS20 PE=1 SV=1
265	1	UniProt_human	J3QRJ8	64	22936	1	1	1	1	0.2	1	2.527	2.656	3.599	Very long-chain-specific acyl-CoA dehydrogenase, mitochondrial (Fragment) OS=Homo sapiens GN=ACADVL PE=1 SV=1
369	1	UniProt_human	H7C086	45	8993	1	1	1	1	0.57	1	2.514	6.761	3.085	ATP synthase subunit O, mitochondrial (Fragment) OS=Homo sapiens GN=ATP5O PE=4 SV=1
294	1	UniProt_human	E9PDQ8	59	46024	1	1	1	1	0.1	1	2.508	2.837	2.854	Succinate--CoA ligase [GDP-forming] subunit beta, mitochondrial OS=Homo sapiens GN=SUCLG2 PE=1 SV=1
146	1	UniProt_human	K7EKL3	116	43483	3	3	2	2	0.21	1	2.502	0.845	3.55	Granulins (Fragment) OS=Homo sapiens GN=GRN PE=1 SV=1
170	1	UniProt_human	P50914	98	28893	2	2	2	2	0.34	1	2.476	4.062	3.033	60S ribosomal protein L14 OS=Homo sapiens GN=RPL14 PE=1 SV=4
131	1	UniProt_human	P13674	132	67496	4	4	3	3	0.21	1	2.47	1.563	3.947	Prolyl 4-hydroxylase subunit alpha-1 OS=Homo sapiens GN=P4HA1 PE=1 SV=2
215	1	UniProt_human	F8W914	79	39571	3	3	1	1	0.11	1	2.464	2.885	2.476	Reticulon OS=Homo sapiens GN=RTN4 PE=1 SV=1
1	1	UniProt_human	P07355	2839	43335	129	129	23	23	11.59	1	2.455	26.082	2.295	Annexin A2 OS=Homo sapiens GN=ANXA2 PE=1 SV=2
139	1	UniProt_human	H3BMH2	120	19098	2	2	1	1	0.24	1	2.451	2.953	3.44	Ras-related protein Rab-11A (Fragment) OS=Homo sapiens GN=RAB11A PE=4 SV=1
62	2	UniProt_human	B7Z645	192	57490	10	10	5	5	0.44	1	2.398	2.126	3.269	Heterogeneous nuclear ribonucleoprotein Q OS=Homo sapiens GN=SYNCRIP PE=1 SV=1
242	1	UniProt_human	H0Y8L7	70	26158	2	2	1	1	0.17	1	2.397	2.717	3.663	40S ribosomal protein S3a (Fragment) OS=Homo sapiens GN=RPS3A PE=1 SV=1
365	1	UniProt_human	C9JI87	46	22712	1	1	1	1	0.2	1	2.396	0.999	3.461	Voltage-dependent anion-selective channel protein 1 (Fragment) OS=Homo sapiens GN=VDAC1 PE=1 SV=6
353	1	UniProt_human	A0A087X2D8	50	157616	1	1	1	1	0.03	1	2.39	2.104	3.717	C-Jun-amino-terminal kinase-interacting protein 4 OS=Homo sapiens GN=SPAG9 PE=1 SV=1
258	1	UniProt_human	Q96DV4	66	46442	1	1	1	1	0.1	1	2.389	1.95	3.507	39S ribosomal protein L38, mitochondrial OS=Homo sapiens GN=MRPL38 PE=1 SV=2
370	1	UniProt_human	H0Y3Y3	45	18638	1	1	1	1	0.25	1	2.388	1.727	3.543	ATP-dependent 6-phosphofructokinase, platelet type (Fragment) OS=Homo sapiens GN=PFKP PE=1 SV=1
85	1	UniProt_human	Q7KZF4	202	110436	5	5	4	4	0.17	1	2.368	2.895	3.202	Staphylococcal nuclease domain-containing protein 1 OS=Homo sapiens GN=SND1 PE=1 SV=1
29	1	UniProt_human	Q5JP53	588	49898	25	25	10	10	1.76	1	2.336	2.298	3.428	Tubulin beta chain OS=Homo sapiens GN=TUBB PE=1 SV=1
360	1	UniProt_human	F8VX04	49	60482	1	1	1	1	0.07	1	2.331	1.824	3.588	Sodium-coupled neutral amino acid transporter 1 OS=Homo sapiens GN=SLC38A1 PE=1 SV=1
247	1	UniProt_human	M0R117	67	20229	3	3	2	2	0.51	1	2.329	2.702	3.202	60S ribosomal protein L18a OS=Homo sapiens GN=RPL18A PE=1 SV=1
334	1	UniProt_human	Q4G176	53	67548	1	1	1	1	0.06	1	2.32	1.922	4.31	Acyl-CoA synthetase family member 3, mitochondrial OS=Homo sapiens GN=ACSF3 PE=1 SV=3
290	1	UniProt_human	C9JQN7	60	19363	2	2	1	1	0.24	1	2.319	2.02	3.672	Eukaryotic translation initiation factor 3 subunit B (Fragment) OS=Homo sapiens GN=EIF3B PE=1 SV=1
338	1	UniProt_human	P62906	53	29427	1	1	1	1	0.15	1	2.309	3.004	3.554	60S ribosomal protein L10a OS=Homo sapiens GN=RPL10A PE=1 SV=2
256	1	UniProt_human	H0YFG2	66	10771	1	1	1	1	0.46	1	2.303	1.876	3.594	Peptidyl-prolyl cis-trans isomerase FKBP4 (Fragment) OS=Homo sapiens GN=FKBP4 PE=1 SV=1
287	1	UniProt_human	M0QXU7	60	36185	2	2	1	1	0.12	1	2.303	1.89	2.196	Mitochondrial import inner membrane translocase subunit TIM44 (Fragment) OS=Homo sapiens GN=TIMM44 PE=1 SV=1
164	1	UniProt_human	J3KTA4	102	74231	5	5	4	4	0.26	1	2.301	2.801	3.375	Probable ATP-dependent RNA helicase DDX5 OS=Homo sapiens GN=DDX5 PE=1 SV=1
299	1	UniProt_human	Q14166	58	77814	1	1	1	1	0.06	1	2.292	2.184	3.032	Tubulin--tyrosine ligase-like protein 12 OS=Homo sapiens GN=TTLL12 PE=1 SV=2
211	1	UniProt_human	P40939	80	93322	4	4	3	3	0.15	1	2.27	1.626	3.278	Trifunctional enzyme subunit alpha, mitochondrial OS=Homo sapiens GN=HADHA PE=1 SV=2
200	1	UniProt_human	Q15717	82	38807	3	3	1	1	0.11	1	2.269	2.192	2.501	ELAV-like protein 1 OS=Homo sapiens GN=ELAVL1 PE=1 SV=2
45	1	UniProt_human	C9J9W2	374	21274	14	14	4	4	1.66	1	2.267	0.679	2.498	LIM and SH3 domain protein 1 (Fragment) OS=Homo sapiens GN=LASP1 PE=1 SV=1
112	1	UniProt_human	P30050	150	20113	5	5	2	2	0.51	1	2.266	3.386	3.384	60S ribosomal protein L12 OS=Homo sapiens GN=RPL12 PE=1 SV=1
351	1	UniProt_human	A0A0D9SFS3	51	120446	1	1	1	1	0.04	1	2.264	1.92	2.356	2-oxoglutarate dehydrogenase, mitochondrial OS=Homo sapiens GN=OGDH PE=1 SV=1
253	1	UniProt_human	K7ELC7	67	19630	1	1	1	1	0.24	1	2.25	2.363	3.819	60S ribosomal protein L27 (Fragment) OS=Homo sapiens GN=RPL27 PE=1 SV=1
163	1	UniProt_human	H0YEN5	104	23878	4	4	2	2	0.42	1	2.246	2.28	3.707	40S ribosomal protein S2 (Fragment) OS=Homo sapiens GN=RPS2 PE=1 SV=1
339	1	UniProt_human	Q8NFC6	52	371479	2	2	1	1	0.01	1	2.235	3.922	3.394	Biorientation of chromosomes in cell division protein 1-like 1 OS=Homo sapiens GN=BOD1L1 PE=1 SV=2
220	1	UniProt_human	A0A0A0MRM9	78	90751	4	4	2	2	0.1	1	2.219	2.48	1.671	Nucleolar and coiled-body phosphoprotein 1 (Fragment) OS=Homo sapiens GN=NOLC1 PE=1 SV=1
267	1	UniProt_human	Q8TD47	63	33168	1	1	1	1	0.14	1	2.21	2.039	2.901	40S ribosomal protein S4, Y isoform 2 OS=Homo sapiens GN=RPS4Y2 PE=2 SV=3
111	1	UniProt_human	Q02878	150	40345	5	5	3	3	0.37	1	2.181	2.912	2.706	60S ribosomal protein L6 OS=Homo sapiens GN=RPL6 PE=1 SV=3
31	1	UniProt_human	Q00839	578	100759	16	16	7	7	0.34	1	2.18	2.035	3.451	Heterogeneous nuclear ribonucleoprotein U OS=Homo sapiens GN=HNRNPU PE=1 SV=6
315	1	UniProt_human	K7ELV2	56	31828	1	1	1	1	0.14	1	2.162	0.903	1.736	Nucleoporin SEH1 (Fragment) OS=Homo sapiens GN=SEH1L PE=1 SV=1
29	2	UniProt_human	P68371	413	52105	23	23	10	10	1.65	1	2.157	2.137	3.105	Tubulin beta-4B chain OS=Homo sapiens GN=TUBB4B PE=1 SV=1
58	1	UniProt_human	A0A087WTP3	291	77594	12	12	6	6	0.39	1	2.154	1.237	1.972	Far upstream element-binding protein 2 OS=Homo sapiens GN=KHSRP PE=1 SV=1
284	1	UniProt_human	Q15393	61	143129	1	1	1	1	0.03	1	2.15	2.331	2.491	Splicing factor 3B subunit 3 OS=Homo sapiens GN=SF3B3 PE=1 SV=4
371	1	UniProt_human	H3BVA8	45	33021	1	1	1	1	0.14	1	2.141	2.089	3.579	Lysine--tRNA ligase (Fragment) OS=Homo sapiens GN=KARS PE=1 SV=1
124	1	UniProt_human	P02786	139	92167	6	6	4	4	0.2	1	2.139	1.901	2.625	Transferrin receptor protein 1 OS=Homo sapiens GN=TFRC PE=1 SV=2
93	1	UniProt_human	P26038	188	76856	14	14	10	10	0.74	1	2.137	2.687	2.97	Moesin OS=Homo sapiens GN=MSN PE=1 SV=3
32	1	UniProt_human	P19338	572	89682	33	33	16	16	1.13	1	2.131	2.266	2.636	Nucleolin OS=Homo sapiens GN=NCL PE=1 SV=3
345	1	UniProt_human	Q8WVC2	52	9853	1	1	1	1	0.51	1	2.129	1.92	2.1	40S ribosomal protein S21 OS=Homo sapiens GN=RPS21 PE=1 SV=1
356	1	UniProt_human	Q9NR30	49	100548	1	1	1	1	0.04	1	2.127	4.184	3.994	Nucleolar RNA helicase 2 OS=Homo sapiens GN=DDX21 PE=1 SV=5
335	1	UniProt_human	O14828	53	39847	1	1	1	1	0.11	1	2.115	2.224	4.009	Secretory carrier-associated membrane protein 3 OS=Homo sapiens GN=SCAMP3 PE=1 SV=3
175	1	UniProt_human	P38606	96	73448	1	1	1	1	0.06	1	2.114	1.817	2.634	V-type proton ATPase catalytic subunit A OS=Homo sapiens GN=ATP6V1A PE=1 SV=2
358	1	UniProt_human	Q15233	49	58232	2	2	2	2	0.16	1	2.11	3.53	2.409	Non-POU domain-containing octamer-binding protein OS=Homo sapiens GN=NONO PE=1 SV=4
383	1	UniProt_human	S4R2Y4	41	15415	1	1	1	1	0.31	1	2.102	1.505	1.687	Chromobox protein homolog 3 (Fragment) OS=Homo sapiens GN=CBX3 PE=1 SV=1
319	1	UniProt_human	M0R2K9	55	28807	1	1	1	1	0.16	1	2.097	1.694	2.84	Peptidylprolyl isomerase (Fragment) OS=Homo sapiens GN=FKBP8 PE=1 SV=2
41	1	UniProt_human	Q9BQE3	426	52746	17	17	9	9	1.06	1	2.092	1.955	2.901	Tubulin alpha-1C chain OS=Homo sapiens GN=TUBA1C PE=1 SV=1
276	1	UniProt_human	P00390	63	61265	1	1	1	1	0.07	1	2.089	1.663	2.872	Glutathione reductase, mitochondrial OS=Homo sapiens GN=GSR PE=1 SV=2
60	1	UniProt_human	A0A087WWT3	281	50882	9	9	1	1	0.09	1	2.088	1.312	1.841	Serum albumin OS=Homo sapiens GN=ALB PE=1 SV=1
145	1	UniProt_human	F8VVM2	116	39452	3	3	1	1	0.11	1	2.082	2.634	3.933	Phosphate carrier protein, mitochondrial OS=Homo sapiens GN=SLC25A3 PE=1 SV=1
331	1	UniProt_human	C9JZR2	54	112710	4	4	2	2	0.08	1	2.061	2.355	6.16	Catenin delta-1 OS=Homo sapiens GN=CTNND1 PE=1 SV=2
70	1	UniProt_human	P30101	240	63808	8	8	4	4	0.39	1	2.032	1.873	2.022	Protein disulfide-isomerase A3 OS=Homo sapiens GN=PDIA3 PE=1 SV=4
91	1	UniProt_human	P07814	191	191954	8	8	6	6	0.14	1	2.014	1.576	3.396	Bifunctional glutamate/proline--tRNA ligase OS=Homo sapiens GN=EPRS PE=1 SV=5
375	1	UniProt_human	F5GXD8	44	17789	1	1	1	1	0.26	1	2	1.628	3.666	Stress-induced-phosphoprotein 1 OS=Homo sapiens GN=STIP1 PE=1 SV=1
386	1	UniProt_human	O15371	39	69697	1	1	1	1	0.06	1	1.986	0.902	3.957	Eukaryotic translation initiation factor 3 subunit D OS=Homo sapiens GN=EIF3D PE=1 SV=1
185	1	UniProt_human	C9JJP5	90	22226	2	2	1	1	0.21	1	1.985	1.243	3.445	Protein TFG (Fragment) OS=Homo sapiens GN=TFG PE=1 SV=1
326	1	UniProt_human	A0A087X2E9	54	9468	1	1	1	1	0.54	1	1.972	1.66	2.809	Glutathione S-transferase P (Fragment) OS=Homo sapiens GN=GSTP1 PE=1 SV=1
39	1	UniProt_human	A0A087WVQ9	447	54482	19	19	6	6	0.72	1	1.964	2.18	3.721	Elongation factor 1-alpha 1 OS=Homo sapiens GN=EEF1A1 PE=1 SV=1
323	1	UniProt_human	Q8NBX0	55	51156	1	1	1	1	0.09	1	1.96	1.931	2.23	Saccharopine dehydrogenase-like oxidoreductase OS=Homo sapiens GN=SCCPDH PE=1 SV=1
261	1	UniProt_human	H3BT58	64	9804	2	2	1	1	0.52	1	1.954	2.711	2.64	Coactosin-like protein OS=Homo sapiens GN=COTL1 PE=1 SV=1
277	1	UniProt_human	E5RGS4	62	15330	1	1	1	1	0.31	1	1.924	1.047	2.336	Prefoldin subunit 1 OS=Homo sapiens GN=PFDN1 PE=1 SV=1
309	1	UniProt_human	H7C1S2	57	29024	1	1	1	1	0.16	1	1.916	1.847	3.47	Bifunctional purine biosynthesis protein PURH (Fragment) OS=Homo sapiens GN=ATIC PE=1 SV=1
245	1	UniProt_human	B0QZ43	69	34660	1	1	1	1	0.13	1	1.895	1.368	2.327	Erlin-1 (Fragment) OS=Homo sapiens GN=ERLIN1 PE=1 SV=1
57	1	UniProt_human	P05023	292	121038	10	10	5	5	0.19	1	1.89	2.47	2.99	Sodium/potassium-transporting ATPase subunit alpha-1 OS=Homo sapiens GN=ATP1A1 PE=1 SV=1
127	1	UniProt_human	Q9BTV4	138	47585	3	3	2	2	0.19	1	1.884	1.387	2.509	Transmembrane protein 43 OS=Homo sapiens GN=TMEM43 PE=1 SV=1
363	1	UniProt_human	G3V192	47	19660	1	1	1	1	0.24	1	1.88	1.523	4.271	Ferritin OS=Homo sapiens GN=FTH1 PE=1 SV=1
155	1	UniProt_human	P30041	109	27757	4	4	3	3	0.57	1	1.874	3.342	1.677	Peroxiredoxin-6 OS=Homo sapiens GN=PRDX6 PE=1 SV=3
206	1	UniProt_human	M0QZC5	81	16294	3	3	2	2	0.66	1	1.863	1.815	2.453	40S ribosomal protein S11 OS=Homo sapiens GN=RPS11 PE=1 SV=1
176	1	UniProt_human	H3BRU6	96	34285	5	5	2	2	0.44	1	1.851	1.775	2.412	Poly(rC)-binding protein 2 (Fragment) OS=Homo sapiens GN=PCBP2 PE=1 SV=1
123	1	UniProt_human	H3BM89	139	45415	2	2	1	1	0.1	1	1.827	1.925	1.814	60S ribosomal protein L4 OS=Homo sapiens GN=RPL4 PE=1 SV=1
208	1	UniProt_human	K7EM49	81	24693	2	2	2	2	0.4	1	1.821	2.089	2.762	6-phosphogluconate dehydrogenase, decarboxylating (Fragment) OS=Homo sapiens GN=PGD PE=1 SV=1
318	1	UniProt_human	Q9H0U6	56	21572	1	1	1	1	0.21	1	1.808	1.146	2.084	39S ribosomal protein L18, mitochondrial OS=Homo sapiens GN=MRPL18 PE=1 SV=1
314	1	UniProt_human	O00151	56	39363	1	1	1	1	0.11	1	1.805	0.954	2.618	PDZ and LIM domain protein 1 OS=Homo sapiens GN=PDLIM1 PE=1 SV=4
236	1	UniProt_human	Q02952	71	212838	2	2	1	1	0.02	1	1.799	1.447	2.394	A-kinase anchor protein 12 OS=Homo sapiens GN=AKAP12 PE=1 SV=4
246	1	UniProt_human	Q7Z6Z7	69	509256	1	1	1	1	0.01	1	1.794	1.278	3.417	E3 ubiquitin-protein ligase HUWE1 OS=Homo sapiens GN=HUWE1 PE=1 SV=3
293	1	UniProt_human	P62805	59	13090	2	2	1	1	0.37	1	1.786	2.552	1.262	Histone H4 OS=Homo sapiens GN=HIST1H4A PE=1 SV=2
221	1	UniProt_human	A0A0G2JJZ9	77	41670	1	1	1	1	0.11	1	1.756	2.295	2.501	Spliceosome RNA helicase DDX39B (Fragment) OS=Homo sapiens GN=DDX39B PE=1 SV=1
278	1	UniProt_human	D6R9L0	56	34859	2	2	2	2	0.27	1	1.745	1.559	2.53	Receptor of-activated protein C kinase 1 (Fragment) OS=Homo sapiens GN=RACK1 PE=1 SV=1
179	1	UniProt_human	K7ELW0	92	20348	6	6	2	2	0.85	1	1.744	1.119	1.47	Protein deglycase DJ-1 OS=Homo sapiens GN=PARK7 PE=1 SV=1
135	1	UniProt_human	K7ELL7	125	65198	6	6	2	2	0.14	1	1.74	0.99	2.459	Glucosidase 2 subunit beta OS=Homo sapiens GN=PRKCSH PE=1 SV=1
133	1	UniProt_human	P12956	129	78445	6	6	3	3	0.24	1	1.738	1.286	2.141	X-ray repair cross-complementing protein 6 OS=Homo sapiens GN=XRCC6 PE=1 SV=2
38	1	UniProt_human	P61978	482	54259	21	21	6	6	0.6	1	1.731	1.981	2.279	Heterogeneous nuclear ribonucleoprotein K OS=Homo sapiens GN=HNRNPK PE=1 SV=1
330	1	UniProt_human	A0A087WUZ3	54	300597	1	1	1	1	0.01	1	1.689	1.915	1.699	Spectrin beta chain OS=Homo sapiens GN=SPTBN1 PE=1 SV=1
136	1	UniProt_human	H0YFA4	125	22860	2	2	2	2	0.44	1	1.681	0.913	2.405	Cysteine-rich protein 2 (Fragment) OS=Homo sapiens GN=CRIP2 PE=1 SV=1
324	1	UniProt_human	P60903	55	13069	2	2	1	1	0.37	1	1.631	9.123	1.84	Protein S100-A10 OS=Homo sapiens GN=S100A10 PE=1 SV=2
199	1	UniProt_human	A0A0B4J1Z1	82	16473	3	3	2	2	0.66	1	1.618	4.318	1.821	Serine/arginine-rich-splicing factor 7 OS=Homo sapiens GN=SRSF7 PE=1 SV=1
322	1	UniProt_human	B5MD38	55	41934	2	2	1	1	0.11	1	1.611	1.164	2.586	Trifunctional enzyme subunit beta, mitochondrial OS=Homo sapiens GN=HADHB PE=1 SV=1
165	1	UniProt_human	Q9NZM1	101	256176	3	3	3	3	0.05	1	1.598	1.772	2.541	Myoferlin OS=Homo sapiens GN=MYOF PE=1 SV=1
341	1	UniProt_human	A0A087X2B5	52	25610	2	2	2	2	0.39	1	1.593	1.343	3.413	Basigin (Fragment) OS=Homo sapiens GN=BSG PE=1 SV=1
188	1	UniProt_human	P48681	89	185834	6	6	4	4	0.1	1	1.571	2.042	2.37	Nestin OS=Homo sapiens GN=NES PE=1 SV=2
273	1	UniProt_human	Q7Z2W4	63	109581	1	1	1	1	0.04	1	1.566	1.066	2.278	Zinc finger CCCH-type antiviral protein 1 OS=Homo sapiens GN=ZC3HAV1 PE=1 SV=3
342	1	UniProt_human	Q9Y266	52	43263	1	1	1	1	0.1	1	1.559	1.403	2.449	Nuclear migration protein nudC OS=Homo sapiens GN=NUDC PE=1 SV=1
24	1	UniProt_human	P06748	693	37454	25	25	6	6	1.46	1	1.557	1.668	1.532	Nucleophosmin OS=Homo sapiens GN=NPM1 PE=1 SV=2
174	1	UniProt_human	H7BY10	97	21827	2	2	1	1	0.21	1	1.545	3.797	2.788	60S ribosomal protein L23a (Fragment) OS=Homo sapiens GN=RPL23A PE=1 SV=1
307	1	UniProt_human	P62851	57	17769	1	1	1	1	0.26	1	1.531	1.934	2.632	40S ribosomal protein S25 OS=Homo sapiens GN=RPS25 PE=1 SV=1
312	1	UniProt_human	D6RBH1	57	24304	1	1	1	1	0.19	1	1.521	1.467	2.411	Vesicular integral-membrane protein VIP36 (Fragment) OS=Homo sapiens GN=LMAN2 PE=1 SV=1
313	1	UniProt_human	Q5T7N0	56	15114	1	1	1	1	0.32	1	1.495	1.14	1.523	60S ribosomal protein L5 (Fragment) OS=Homo sapiens GN=RPL5 PE=1 SV=2
238	1	UniProt_human	Q13177	71	65211	2	2	1	1	0.07	1	1.495	1.592	2.059	Serine/threonine-protein kinase PAK 2 OS=Homo sapiens GN=PAK2 PE=1 SV=3
5	2	UniProt_human	P35527	1299	65918	50	50	17	17	2.38	1	1.482	0.946	1.181	Keratin, type I cytoskeletal 9 OS=Homo sapiens GN=KRT9 PE=1 SV=3
366	1	UniProt_human	P05455	46	55742	1	1	1	1	0.08	1	1.474	1.245	1.559	Lupus La protein OS=Homo sapiens GN=SSB PE=1 SV=2
74	1	UniProt_human	J3KQE5	225	29537	5	5	2	2	0.33	1	1.428	2.978	1.613	GTP-binding nuclear protein Ran (Fragment) OS=Homo sapiens GN=RAN PE=1 SV=1
377	1	UniProt_human	G5E9S2	44	71757	1	1	1	1	0.06	1	1.422	0.746	1.506	Hydroxysteroid (17-beta) dehydrogenase 4, isoform CRA_a OS=Homo sapiens GN=HSD17B4 PE=1 SV=1
187	1	UniProt_human	Q5JQ13	89	95460	2	2	2	2	0.09	1	1.42	0.962	1.513	Vinculin (Fragment) OS=Homo sapiens GN=VCL PE=1 SV=1
168	1	UniProt_human	I3L397	99	17738	4	4	2	2	0.6	1	1.401	1.516	1.775	Eukaryotic translation initiation factor 5A (Fragment) OS=Homo sapiens GN=EIF5A PE=1 SV=8
207	1	UniProt_human	A0A0A0MS51	81	89103	2	2	2	2	0.1	1	1.392	0.746	1.668	Gelsolin OS=Homo sapiens GN=GSN PE=1 SV=1
385	1	UniProt_human	Q02413	39	118719	1	1	1	1	0.04	1	1.387	1.272	1.054	Desmoglein-1 OS=Homo sapiens GN=DSG1 PE=1 SV=2
213	1	UniProt_human	P26373	80	27993	4	4	3	3	0.57	1	1.37	2.121	1.838	60S ribosomal protein L13 OS=Homo sapiens GN=RPL13 PE=1 SV=4
372	1	UniProt_human	K7EKG2	44	3000	1	1	1	1	2.5	1	1.352	1.748	3.541	Thioredoxin-like protein 1 (Fragment) OS=Homo sapiens GN=TXNL1 PE=1 SV=1
237	1	UniProt_human	Q03252	71	75670	1	1	1	1	0.06	1	1.325	3.367	1.643	Lamin-B2 OS=Homo sapiens GN=LMNB2 PE=1 SV=4
49	1	UniProt_human	E7EN95	331	279033	14	14	13	13	0.22	1	1.311	1.029	1.825	Filamin-B OS=Homo sapiens GN=FLNB PE=1 SV=1
239	1	UniProt_human	Q07065	71	71891	2	2	2	2	0.12	1	1.303	1.899	1.695	Cytoskeleton-associated protein 4 OS=Homo sapiens GN=CKAP4 PE=1 SV=2
3	1	UniProt_human	P04264	1874	70178	106	106	17	17	1.96	1	1.288	0.884	0.933	Keratin, type II cytoskeletal 1 OS=Homo sapiens GN=KRT1 PE=1 SV=6
222	1	UniProt_human	Q16698	77	39791	3	3	2	2	0.24	1	1.288	1.669	1.163	2,4-dienoyl-CoA reductase, mitochondrial OS=Homo sapiens GN=DECR1 PE=1 SV=1
64	1	UniProt_human	M0R1V7	267	8281	7	7	4	4	6.02	1	1.28	1.601	1.743	Ubiquitin-60S ribosomal protein L40 (Fragment) OS=Homo sapiens GN=UBA52 PE=1 SV=1
264	1	UniProt_human	P78527	64	508704	1	1	1	1	0.01	1	1.275	1.23	1.517	DNA-dependent protein kinase catalytic subunit OS=Homo sapiens GN=PRKDC PE=1 SV=3
150	1	UniProt_human	A0A0C4DGS1	112	51795	1	1	1	1	0.08	1	1.233	1.226	1.794	Dolichyl-diphosphooligosaccharide--protein glycosyltransferase 48 kDa subunit OS=Homo sapiens GN=DDOST PE=1 SV=1
311	1	UniProt_human	Q969X5	57	34877	1	1	1	1	0.13	1	1.22	1.511	2.057	Endoplasmic reticulum-Golgi intermediate compartment protein 1 OS=Homo sapiens GN=ERGIC1 PE=1 SV=1
337	1	UniProt_human	P49207	53	15734	1	1	1	1	0.3	1	1.176	1.586	1.788	60S ribosomal protein L34 OS=Homo sapiens GN=RPL34 PE=1 SV=3
205	1	UniProt_human	C9JNW5	81	20846	2	2	1	1	0.22	1	1.173	1.375	1.573	60S ribosomal protein L24 OS=Homo sapiens GN=RPL24 PE=1 SV=1
51	1	UniProt_human	P49411	325	53977	11	11	4	4	0.37	1	1.153	1.117	1.918	Elongation factor Tu, mitochondrial OS=Homo sapiens GN=TUFM PE=1 SV=2
22	1	UniProt_human	Q60FE5	725	301253	31	31	20	20	0.34	1	1.14	1.19	1.465	Filamin A OS=Homo sapiens GN=FLNA PE=1 SV=1
214	1	UniProt_human	P50416	80	94795	2	2	1	1	0.05	1	1.14	1.066	1.315	Carnitine O-palmitoyltransferase 1, liver isoform OS=Homo sapiens GN=CPT1A PE=1 SV=2
364	1	UniProt_human	M0QXF7	46	10673	1	1	1	1	0.47	1	1.113	1.545	1.571	Myeloid-derived growth factor (Fragment) OS=Homo sapiens GN=MYDGF PE=1 SV=1
380	1	UniProt_human	F5GX14	42	26191	1	1	1	1	0.17	1	1.105	1.576	2.187	Malectin OS=Homo sapiens GN=MLEC PE=1 SV=1
3	2	UniProt_human	P35908	729	70581	34	34	13	13	1.18	1	1.091	0.812	0.77	Keratin, type II cytoskeletal 2 epidermal OS=Homo sapiens GN=KRT2 PE=1 SV=2
140	1	UniProt_human	Q14247	120	69042	3	3	1	1	0.06	1	1.089	0.769	1.074	Src substrate cortactin OS=Homo sapiens GN=CTTN PE=1 SV=2
14	1	UniProt_human	Q09666	1217	748016	55	55	33	33	0.21	1	1.068	3.155	1.171	Neuroblast differentiation-associated protein AHNAK OS=Homo sapiens GN=AHNAK PE=1 SV=2
3	5	UniProt_human	P13647	151	66663	5	5	4	4	0.29	1	1.065	0.855	0.75	Keratin, type II cytoskeletal 5 OS=Homo sapiens GN=KRT5 PE=1 SV=3
5	1	UniProt_human	P13645	1797	62250	56	56	17	17	2.63	1	1.05	0.84	0.805	Keratin, type I cytoskeletal 10 OS=Homo sapiens GN=KRT10 PE=1 SV=6
58	2	UniProt_human	E9PEB5	124	73040	3	3	2	2	0.12	1	1.039	0.485	0.86	Far upstream element-binding protein 1 OS=Homo sapiens GN=FUBP1 PE=1 SV=1
17	1	UniProt_human	P08670	848	56933	55	55	21	21	3.75	1	1.003	1.763	0.942	Vimentin OS=Homo sapiens GN=VIM PE=1 SV=4
350	1	UniProt_human	H0YJH9	51	11940	1	1	1	1	0.41	1	1.002	1.048	1.183	Polyadenylate-binding protein 2 (Fragment) OS=Homo sapiens GN=PABPN1 PE=1 SV=1
67	1	UniProt_human	P62424	251	35741	11	11	3	3	0.42	1	0.998	1.544	1.083	60S ribosomal protein L7a OS=Homo sapiens GN=RPL7A PE=1 SV=2
212	1	UniProt_human	P62263	80	18136	2	2	1	1	0.26	1	0.994	1.494	1.497	40S ribosomal protein S14 OS=Homo sapiens GN=RPS14 PE=1 SV=3
192	1	UniProt_human	H0Y6E7	85	33855	2	2	2	2	0.28	1	0.973	1.548	1.051	RNA-binding motif protein, X chromosome (Fragment) OS=Homo sapiens GN=RBMX PE=1 SV=2
97	1	UniProt_human	E9PKZ0	185	25690	9	9	3	3	0.63	1	0.967	1.037	1.274	60S ribosomal protein L8 (Fragment) OS=Homo sapiens GN=RPL8 PE=1 SV=1
5	4	UniProt_human	P02533	154	54988	8	8	4	4	0.36	1	0.941	0.645	0.865	Keratin, type I cytoskeletal 14 OS=Homo sapiens GN=KRT14 PE=1 SV=4
17	2	UniProt_human	P05787	107	58426	5	5	2	2	0.16	1	0.934	1.825	0.986	Keratin, type II cytoskeletal 8 OS=Homo sapiens GN=KRT8 PE=1 SV=7
3	3	UniProt_human	P48668	310	64455	17	17	9	9	0.8	1	0.918	0.659	0.676	Keratin, type II cytoskeletal 6C OS=Homo sapiens GN=KRT6C PE=1 SV=3
349	1	UniProt_human	Q14315	51	313753	1	1	1	1	0.01	1	0.916	0.885	2.252	Filamin-C OS=Homo sapiens GN=FLNC PE=1 SV=3
5	3	UniProt_human	P08727	281	46241	13	13	5	5	0.58	1	0.897	1.916	1.056	Keratin, type I cytoskeletal 19 OS=Homo sapiens GN=KRT19 PE=1 SV=4
230	1	UniProt_human	P23526	73	52008	2	2	2	2	0.18	1	0.896	0.747	1.443	Adenosylhomocysteinase OS=Homo sapiens GN=AHCY PE=1 SV=4
5	6	UniProt_human	P08779	128	53830	7	7	4	4	0.37	1	0.891	0.586	0.835	Keratin, type I cytoskeletal 16 OS=Homo sapiens GN=KRT16 PE=1 SV=4
332	1	UniProt_human	Q5M775	54	131049	1	1	1	1	0.03	1	0.88	0.937	1.479	Cytospin-B OS=Homo sapiens GN=SPECC1 PE=1 SV=1
5	5	UniProt_human	F8VZY9	143	46629	6	6	3	3	0.31	1	0.863	2.671	1.127	Keratin, type I cytoskeletal 18 OS=Homo sapiens GN=KRT18 PE=1 SV=1
3	4	UniProt_human	O95678	193	63415	8	8	4	4	0.31	1	0.842	1.087	0.734	Keratin, type II cytoskeletal 75 OS=Homo sapiens GN=KRT75 PE=1 SV=2
225	1	UniProt_human	A0A087WUN7	75	10923	3	3	3	3	2.1	1	0.836	0.937	1.303	SRA stem-loop-interacting RNA-binding protein, mitochondrial OS=Homo sapiens GN=SLIRP PE=1 SV=1
292	1	UniProt_human	P62318	59	15492	2	2	1	1	0.31	1	0.805	0.887	1.457	Small nuclear ribonucleoprotein Sm D3 OS=Homo sapiens GN=SNRPD3 PE=1 SV=1
34	1	UniProt_human	P02545	548	80003	26	26	11	11	0.89	1	0.799	4.18	1.093	Prelamin-A/C OS=Homo sapiens GN=LMNA PE=1 SV=1
121	1	UniProt_human	P23246	142	81001	4	4	2	2	0.11	1	0.786	1.753	0.795	Splicing factor, proline- and glutamine-rich OS=Homo sapiens GN=SFPQ PE=1 SV=2
373	1	UniProt_human	Q96PK6	44	72331	1	1	1	1	0.06	1	0.732	1.101	0.658	RNA-binding protein 14 OS=Homo sapiens GN=RBM14 PE=1 SV=2
98	1	UniProt_human	H0Y2V1	181	56686	8	8	4	4	0.35	1	0.69	0.697	0.86	Microtubule-associated protein (Fragment) OS=Homo sapiens GN=MAP4 PE=1 SV=1
344	1	UniProt_human	P09382	52	16003	1	1	1	1	0.3	1	0.688	0.937	1.071	Galectin-1 OS=Homo sapiens GN=LGALS1 PE=1 SV=2
223	1	UniProt_human	Q12906	76	104790	4	4	3	3	0.13	1	0.674	0.649	0.918	Interleukin enhancer-binding factor 3 OS=Homo sapiens GN=ILF3 PE=1 SV=3
128	1	UniProt_human	Q15149	137	567059	7	7	6	6	0.05	1	0.63	0.848	0.825	Plectin OS=Homo sapiens GN=PLEC PE=1 SV=3
181	1	UniProt_human	H0YLA2	91	15067	2	2	1	1	0.32	1	0.627	0.719	0.81	Signal recognition particle 14 kDa protein OS=Homo sapiens GN=SRP14 PE=1 SV=1
382	1	UniProt_human	E9PR30	41	13060	1	1	1	1	0.37	1	0.578	0.912	0.659	40S ribosomal protein S30 OS=Homo sapiens GN=FAU PE=1 SV=1
327	1	UniProt_human	H3BPE7	54	55626	1	1	1	1	0.08	1	0.514	1	0.605	RNA-binding protein FUS OS=Homo sapiens GN=FUS PE=1 SV=1
270	1	UniProt_human	H0YHG0	63	65634	2	2	2	2	0.14	1	0.432	0.563	0.553	Uncharacterized protein (Fragment) OS=Homo sapiens PE=1 SV=1
254	1	UniProt_human	H0YJH7	67	30597	2	2	1	1	0.15	1	0.343	0.981	0.445	Lamina-associated polypeptide 2, isoforms beta/gamma (Fragment) OS=Homo sapiens GN=TMPO PE=1 SV=1
48	1	UniProt_human	U3KQK0	338	22827	10	10	4	4	1.08	1	0.317	1.861	0.266	Histone H2B OS=Homo sapiens GN=HIST1H2BN PE=1 SV=1
218	1	UniProt_human	A2A2D0	78	11805	1	1	1	1	0.42	1	0.316	0.23	0.487	Stathmin (Fragment) OS=Homo sapiens GN=STMN1 PE=1 SV=8
234	1	UniProt_human	A0A0U1RR32	72	20632	4	4	2	2	0.5	1	0.297	2.089	0.279	Histone H2A OS=Homo sapiens GN=hCG_2039566 PE=3 SV=1
65	1	UniProt_human	E9PB61	265	29270	9	9	3	3	0.77	1	0.296	0.61	0.391	THO complex subunit 4 OS=Homo sapiens GN=ALYREF PE=1 SV=1
118	1	UniProt_human	P17096	147	14119	3	3	1	1	0.34	1	0.21	0.194	0.222	High mobility group protein HMG-I/HMG-Y OS=Homo sapiens GN=HMGA1 PE=1 SV=3
13	1	UniProt_human	P10412	1242	30930	42	42	8	8	1.96	1	0.095	0.333	0.12	Histone H1.4 OS=Homo sapiens GN=HIST1H1E PE=1 SV=2
